# Supplementary material for: Compliance with continuing medical education requirements among health professionals at a tertiary hospital in Viet Nam
Source: Research Square preprint supplement (doi:10.21203/rs.3.rs-7853272/v1), 2026-01-28
Supplement: Supplementary file 1 [file be030800c533ac45fb0bfedd.docx]

**APPENDIX 1**

**QUESTIONAIRE ON THE CURRENT SITUATION AND SOME FACTORS AFFECTING CONTINUOUS MEDICAL EDUCATION ACTIVITIES AMONG PRACTITIONERS AT DA NANG HOSPITAL IN THE PERIOD 2020-2025.**

*** In order to give evidence based recommendations to help the continuous training of medical staff be scientifically, practically organized, and in line with the needs in the context of changes in the system of newly issued legal guidance documents, the research team conducted this survey of “The current situation and some factors affecting continuous medical education among practitioners at Da Nang Hospital in the period of 2020-2025" with two research objectives:

• Describe the current situation of continuous medical education among practitioners at Da Nang Hospital in the period of 2020-2025.

• Analyze some factors affecting continuous medical education activities among practitioners at Da Nang Hospital.

*** The DOHA Department is collecting data on continuing education of medical staff.

We assure you that the information you provide will be kept strictly confidential.

We hope you agree to participate in the survey.

- I agree to participate in this survey
- I do not agree to participate in this survey

**1.1. General information**

| **No** | **Information** | | **Answer (mark X or fill in appropriate information)** |
| --- | --- | --- | --- |
| 1 | Year of birth | |  |
| 2 | Sex | Male |  |
| Female |  |
| 3 | Occupational title | Physician |  |
| Medicine man (not a physician) |  |
| Nurse |  |
| Midwife |  |
| Technician |  |
| Clinical nutritionist |  |
| Pharmacist |  |
| 4 | Professional qualification | Post-graduate |  |
| Graduate |
| Diplomas |
| 5 | Department | |  |
| 6 | Current position | Faculty/Department leader board |  |
| No management position |  |
| 7 | Years of service | Seniority <5 years |  |
| From 5-10 years |  |
| Seniority >10 years |  |
| Under 2 years |
| 8 | Workload | Overloaded |  |
| Not overloaded |  |
| 9 | Need for career advancement | Having a desire for promotion |  |
| No promotion desired |  |

**1.2. The current situation of continuous medical education activities among practitioners at Da Nang hospital in the period 2020-2025**

| **No** | **Information** | | **Answer (mark X or fill in appropriate information)** |
| --- | --- | --- | --- |
| 1. | In your opinion, is continuing education a mandatory obligation for medical practitioners? | Mandatory |  |
| Optional |  |
| Not sure |  |
| 2. | According to current regulations, how many credit hours are practitioners required to participate in continuous medical education? (Please answer with the information you know, do not use other forms of search and support) | 24 credits / 01 year |  |
| 48 credits/ 02 years |  |
| 120 credits/ 05 years |  |
| 3. | What forms of continuing education/continuous medical education have you participated in from 2020-2025? (multiple answers are possible) | Short-term training courses |  |
| Conferences, Seminars |  |
| Researches |  |
| Educational teaching |  |
| Other self-updates (thesis guidance, professional activities, currently enrolled in university degree training courses) |  |
| All of the above |  |
| 4. | What type of continuing education/ continuous medical education courses have you attended? (Multiple answers are possible) | In person |  |
| Online |  |
| Hybrid |  |
| 5. | Training locations | Da Nang hospital |  |
| Outside of Da Nang hopsital but within Da Nang City |  |
| Outside of Da Nang City |  |
| 6. | The duration of continuing education/ continuing medical education courses you regularly attend | 3- 6 months |  |
| 1-3 months |  |
| 10 days – 1 month |  |
| From 2 - 10 days |  |
| Under 2 days |  |
| 7. | How many continuing education credit hours did you attend in 2020? (Answer "No" if no information available or fill in the number of credit hours if information is available) | |  |
| 8. | How many continuing education credit hours did you attend in 2021? (Answer "No" if no information available or fill in the number of credit hours if information is available) | |  |
| 9. | How many continuing education credit hours did you attend in 2022? (Answer "No" if no information available or fill in the number of credit hours if information is available) | |  |
| 10. | How many continuing education credit hours did you attend in 2023? (Answer "No" if no information available or fill in the number of credit hours if information is available) | |  |
| 11. | How many continuing education credit hours did you attend in 2024? (Answer "No" if no information available or fill in the number of credit hours if information is available) | |  |

**1.3. The affecting factors of continuous medical education activities among practitioners at Da Nang hospital in the period 2020-2025**

**When choosing a training course, to what extent do you consider the following factors?**

| **No** | **Information** | | **Answer (mark X or fill in appropriate information)** |
| --- | --- | --- | --- |
|  | Questions 11 to 14: Factors influencing training programs | |  |
|  | How concerned are you about the course being well-informed? | No attention |  |
| Little attention |  |
| Normal |  |
| Attentive |  |
| Special attention |  |
|  | How concerned are you about the qualifications and competence of the course's teaching staff? | No attention |  |
| Little attention |  |
| Normal |  |
| Attentive |  |
| Special attention |  |
|  | How concerned are you about course costs? | No attention |  |
| Little attention |  |
| Normal |  |
| Attentive |  |
| Special attention |  |
|  | How concerned are you about whether the Course Organizing Committee provides administrative support for the courses (registration procedures, testing, etc.)? | No attention |  |
| Little attention |  |
| Normal |  |
| Attentive |  |
| Special attention |  |
|  | Questions 15 to 17: Factors influencing technical issues | |  |
|  | How concerned are you about the course being in incorporating information technology into its organization? | No attention |  |
| Little attention |  |
| Normal |  |
| Attentive |  |
| Special attention |  |
|  | How concerned are you about the course delivery format (online / in-person / hybrid) | No attention |  |
| Little attention |  |
| Normal |  |
| Attentive |  |
| Special attention |  |
|  | How concerned are you about the course with mandatory attendance and assessment? | No attention |  |
| Little attention |  |
| Normal |  |
| Attentive |  |
| Special attention |  |
|  | Questions 18 to 22: Factors affecting the objective environment | |  |
|  | Are you interested in being informed about the legal requirements for continuing education? | No attention |  |
| Little attention |  |
| Normal |  |
| Attentive |  |
| Special attention |  |
|  | Are you interested in enrolling in continuing education courses to renew your license? | No attention |  |
| Little attention |  |
| Normal |  |
| Attentive |  |
| Special attention |  |
|  | Are you concerned about finding enough time to attend continuing education courses? | No attention |  |
| Little attention |  |
| Normal |  |
| Attentive |  |
| Special attention |  |
|  | Are you concerned about the distance to study location? | No attention |  |
| Little attention |  |
| Normal |  |
| Attentive |  |
| Special attention |  |
|  | Are you interested in the accessibility of training courses? | No attention |  |
| Little attention |  |
| Normal |  |
| Attentive |  |
| Special attention |  |
|  | Questions 23 to 28: Factors influencing workplace (organization) | |  |
|  | Are you interested in the hospital continuing education promotion policy? | No attention |  |
| Little attention |  |
| Normal |  |
| Attentive |  |
| Special attention |  |
|  | How interested are you in receiving training costs coverage? | No attention |  |
| Little attention |  |
| Normal |  |
| Attentive |  |
| Special attention |  |
|  | How concerned are you about the internal discipline of your organization if you do not attend the full training period? | No attention |  |
| Little attention |  |
| Normal |  |
| Attentive |  |
| Special attention |  |
|  | How interested are you in being provided with legal information on continuing education by your work organization? | No attention |  |
| Little attention |  |
| Normal |  |
| Attentive |  |
| Special attention |  |
|  | How interested are you in having your leadership/supervisor facilitate ongoing training? | No attention |  |
| Little attention |  |
| Normal |  |
| Attentive |  |
| Special attention |  |
|  | How concerned are you about your organization providing adequate time for continuing education? | No attention |  |
| Little attention |  |
| Normal |  |
| Attentive |  |
| Special attention |  |
|  | Other factors not listed, Other reasons influencing | |  |

**APPENDIX 2. SECONDARY DATA COLLECTION FORM**

**THE CURRENT SITUATION AND SOME FACTORS AFFECTING CONTINUOUS MEDICAL KNOWLEDGE UPDATE ACTIVITIES AMONG PRACTITIONERS AT DA NANG HOSPITAL IN THE PERIOD 2020-2025.**

*** The investigator reads the reports related to CME activities, then reviews the content related to the collection form and fills in the content on the secondary data collection form.

| **No** | **Content** | **2020** | **2021** | **2022** | **2023** | **2024** | **2025** | **Notes** |
| --- | --- | --- | --- | --- | --- | --- | --- | --- |
| 1 | Organization’s Continuing Education Plan |  |  |  |  |  |  | Yes/ No |
| 2 | Number of approved training programs |  |  |  |  |  |  | Count the number of training programs approved by year |
| 3 | Qualifications and competencies of the teaching staff |  |  |  |  |  |  | Percentage of training class records with lecturer competency records |
| 4 | Number of participants in the CME courses in 2020-2025 (organized by Da Nang hospital) |  |  |  |  |  |  | Number of Da Nang hospital’s staff receiving CME per year |
| 5 | Administrative support |  |  |  |  |  |  | Percentage of training classes with administrative support |
| 6 | Participation costs |  |  |  |  |  |  | Total attending fee (for Da Nang hospital’s staff) |
